# Supplementary material for: Overcoming Chromium Poisoning in Solid Oxide Cells Through Multiscale Perovskite Engineering
Source: Research Square preprint supplement (doi:10.21203/rs.3.rs-7778945/v1), 2025-10-20
Supplement: Supplementary file 1 [file 9981b227ab7f12c982a5292f.docx]

**Supporting Information**

**Overcoming Chromium Poisoning in Solid Oxide Cells Through Multiscale Perovskite Engineering**

Min Lia1, Huixian Liub1, Yunfei Bub*, Xiang Wanga, Haoran Wangb, Jiawei Chena, Jiawei Lia, Yantao Zhaoc and Zhibin Yanga,b*

a China University of Mining and Technology-Beijing, Beijing, 100083, China

b Beijing Huairou Laboratory, Beijing, 101400, China

c Shanxi Research Institute of Huairou Laboratory, Taiyuan, 030024, China

* yunfei.bu@nuist.edu.cn (Yunfei Bu)

yangzhibin0001@163.com (Zhibin Yang)

**Experimental section**

**Powder synthesis**

The electrode powder is made by the sol-gel approach. Take La0.6Sr0.1Ba0.35Co0.2Fe0.78Mo0.02O3₋*δ* (LSB0.35CFM0.02) as an example. The molar ratios of La(NO3)3·6H2O (99.9%), Sr(NO3)2 (99.5%), Ba(NO3)2 (99.5%), Co(NO3)2·6H2O (99.9%), Fe(NO3)3·9H2O (99.9%), and (NH4)6Mo7O24·4H2O (99.9%) were weighed according to the target composition of LSB0.35CFM0.02 and were configured as a solution. The citric acid (CA, 99.5%) and ethylenediaminetetraacetic acid (EDTA, 99.5%) were mixed with the molar proportion of EDTA, CA, and metal ions (1:1.5:1). The solution's pH was subsequently raised to ~9. The gel was obtained after continuous heating (90 °C, 10 h), and it was calcined (1000 °C, 5 h) to crystallize the powder.

**Cell fabrication and tests**

The Ni-YSZ/Ni-SSZ/SSZ/GDC half-cell, SSZ electrolyte and GDC powder are purchased from SOFCMAN. The GDC ink was made by mixing and milling an appropriate amount of GDC powder containing 6 wt.% ethylcellulose, and then it was subsequently sintered (1300 °C, 5 h) on the SSZ electrolyte. The LSB0.35CFM0.02 ink was prepared using the same method and then sintered onto the GDC layer, obtaining LSB0.35CFM0.02/GDC/SSZ/GDC/LSB0.35CFM0.02 symmetrical half-cell and Ni-YSZ/Ni-SSZ/SSZ/GDC/LSB0.35CFM0.02 single-cell. The *I*–*V* and EIS of the cells at various conditions were obtained by Autolab workstation. Silver paste was brushed onto the electrode surfaces, followed by the attachment of silver wires. The assembly was then connected to the Autolab workstation, and a current density of 0.5 A·cm⁻2 was applied during the test. Cr2O3 powder (~10 g) was placed in a separate alumina boat 10 mm from the front of the cell as the Cr source.

**Calculations**

All spin-polarized periodic density functional theory (DFT) calculations were performed using the Vienna Ab initio Simulation Package (VASP) with the Perdew–Burke–Ernzerhof functional and Grimme's DFT-D3 dispersion correction.1-3 A plane-wave cutoff of 400 eV and a (2 × 2 × 1) k-point mesh were used, with convergence criteria of 1 × 10⁻5 eV for energy and 0.03 eV/Å for forces. Effective Hubbard U values of 4, 6.5, 3, and 2 eV were applied to Fe,4 Co,5 Cr,6 and Mo,7 respectively. The AO-terminated (100) surfaces of LSCF (La0.6Sr0.4Co0.2Fe0.8O3₋*δ*) were modeled using a supercell size of 7.71 Å ×19.27 Å in the xy-plane with eight atomic layers in the z-direction and a 20 Å vacuum gap to prevent spurious interactions. During structural optimization, the bottom four layers were fixed while the others were fully relaxed. The LSBCF (La0.6Sr0.1Ba0.3Co0.2Fe0.8O3₋*δ*) surface was created by replacing three-quarters of Sr with Ba in the LSCF lattice, and the LSBCFM (La0.6Sr0.1Ba0.3Co0.2Fe0.78Mo0.02O3₋*δ*) surface was further generated by substituting one Fe atom with Mo. The top and side views of the three surface models are shown in Figure S15.

**Supplementary Figures**


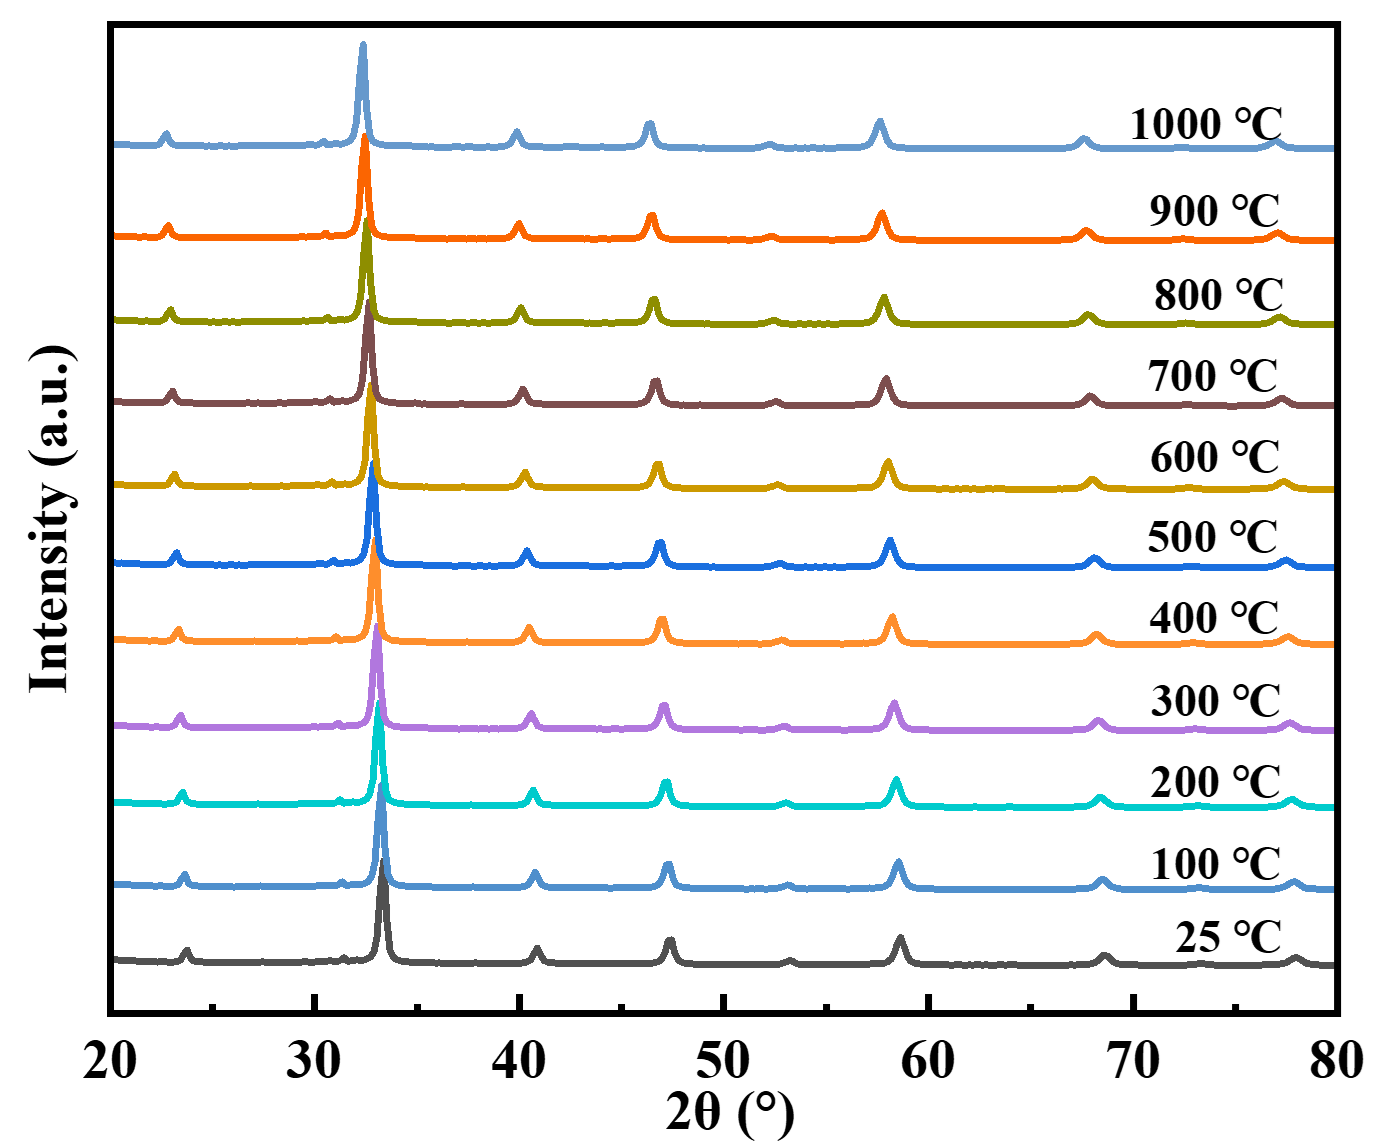


**Figure S1.** HT-XRD pattern of LSB0.35CFM0.02 powder.


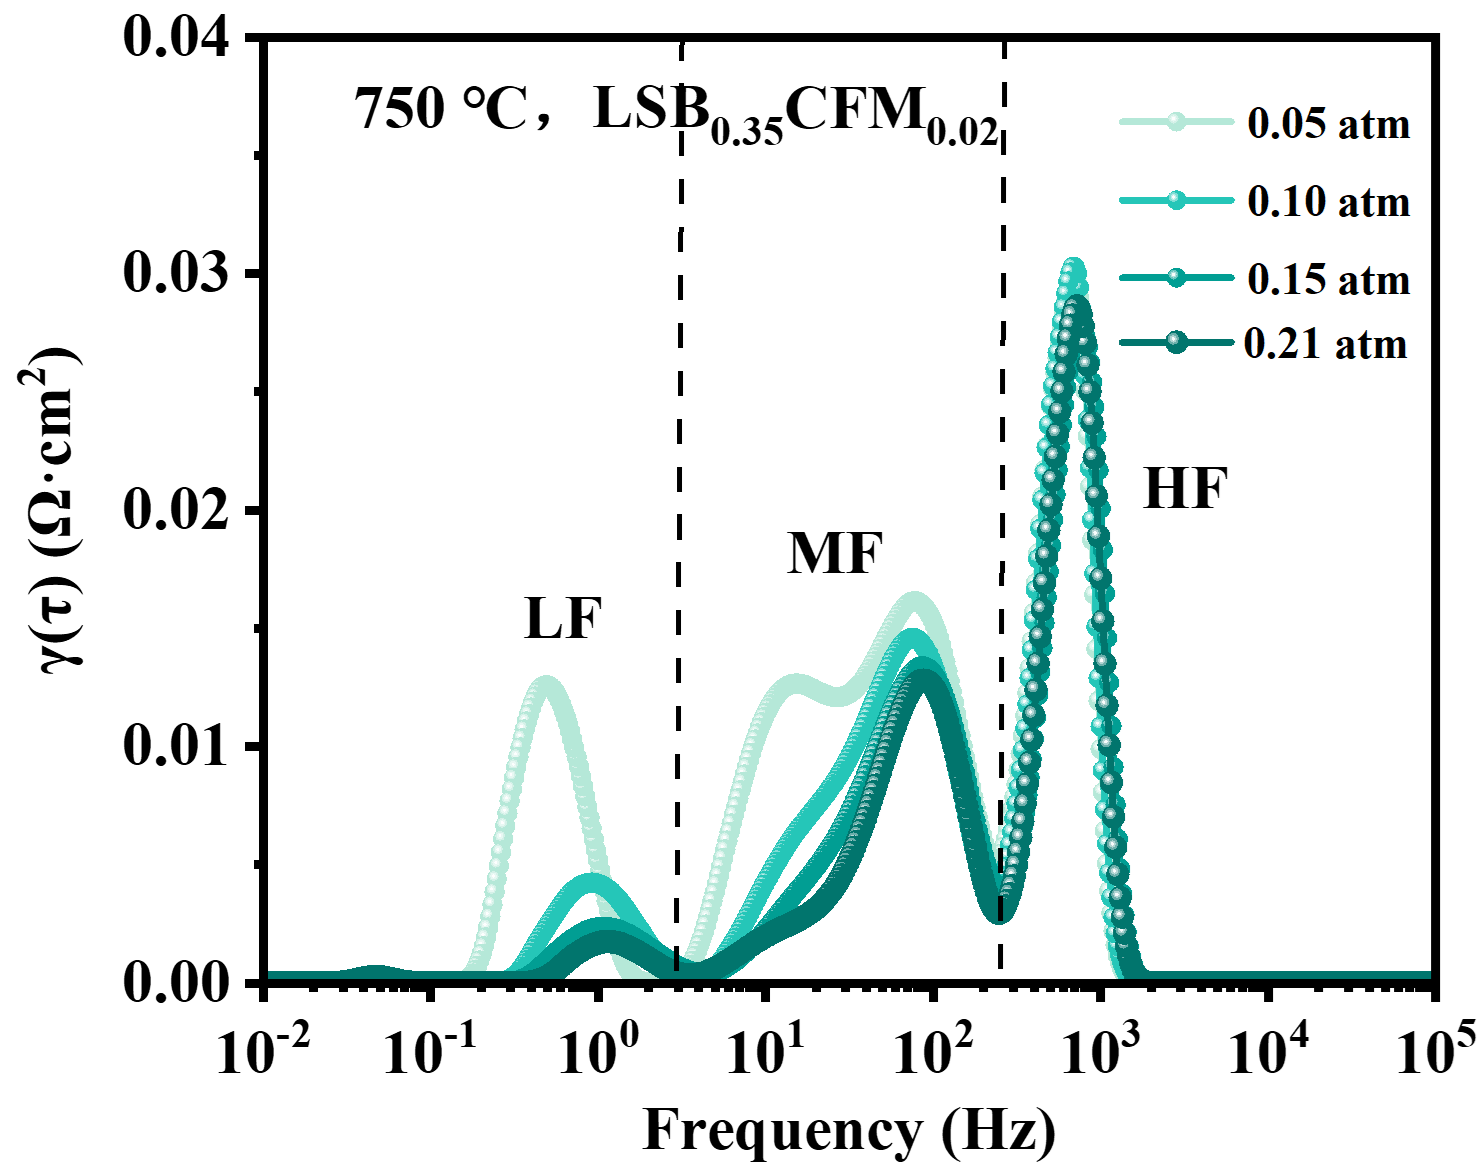


**Figure S2.** DRT curves of symmetric cells with LSB0.35CFM0.02 under various *p*O2 at 750 ℃.


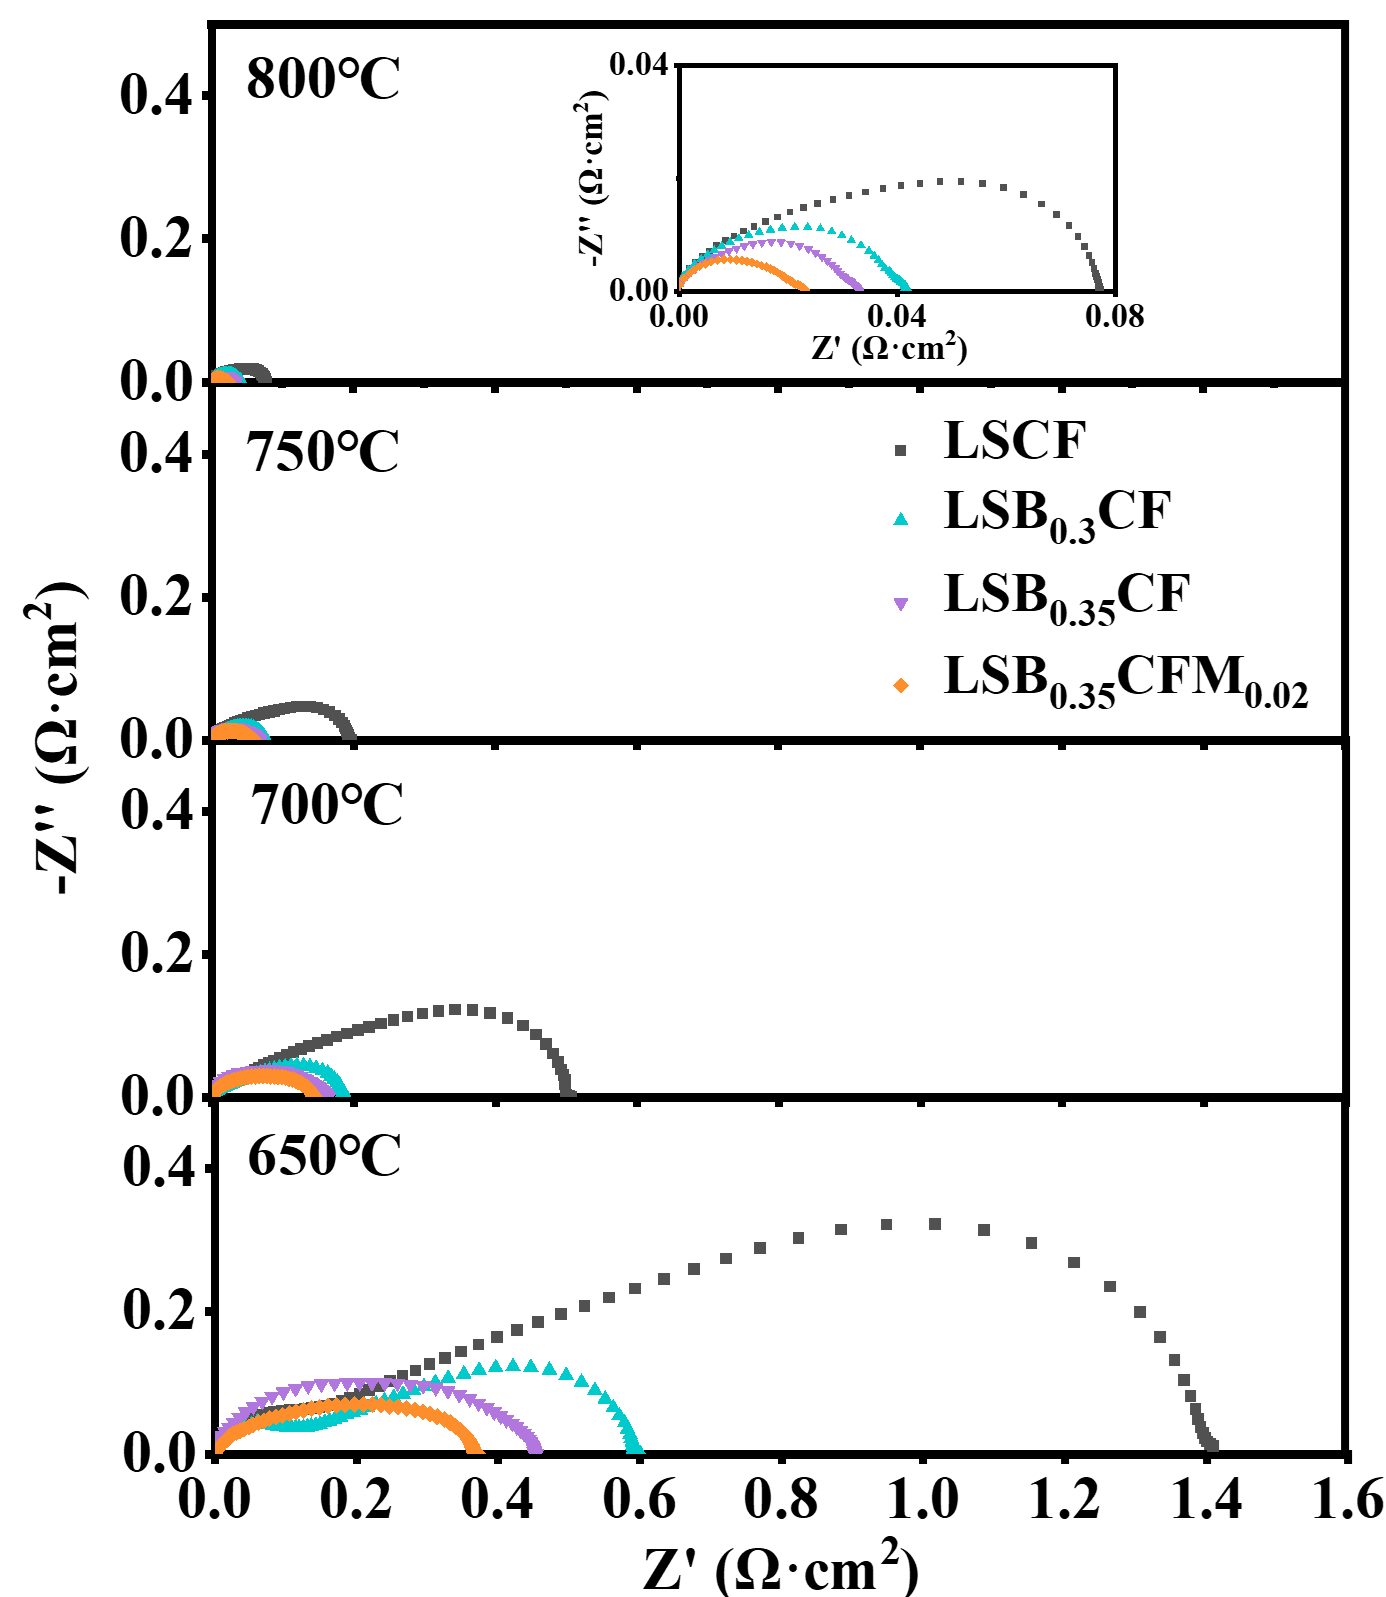


**Figure** **S3.** EIS curves of symmetric cells with LSB*x*CFMy (*x*=0, 0.3, 0.35; *y*=0, 0.02) at 650~800 ℃.


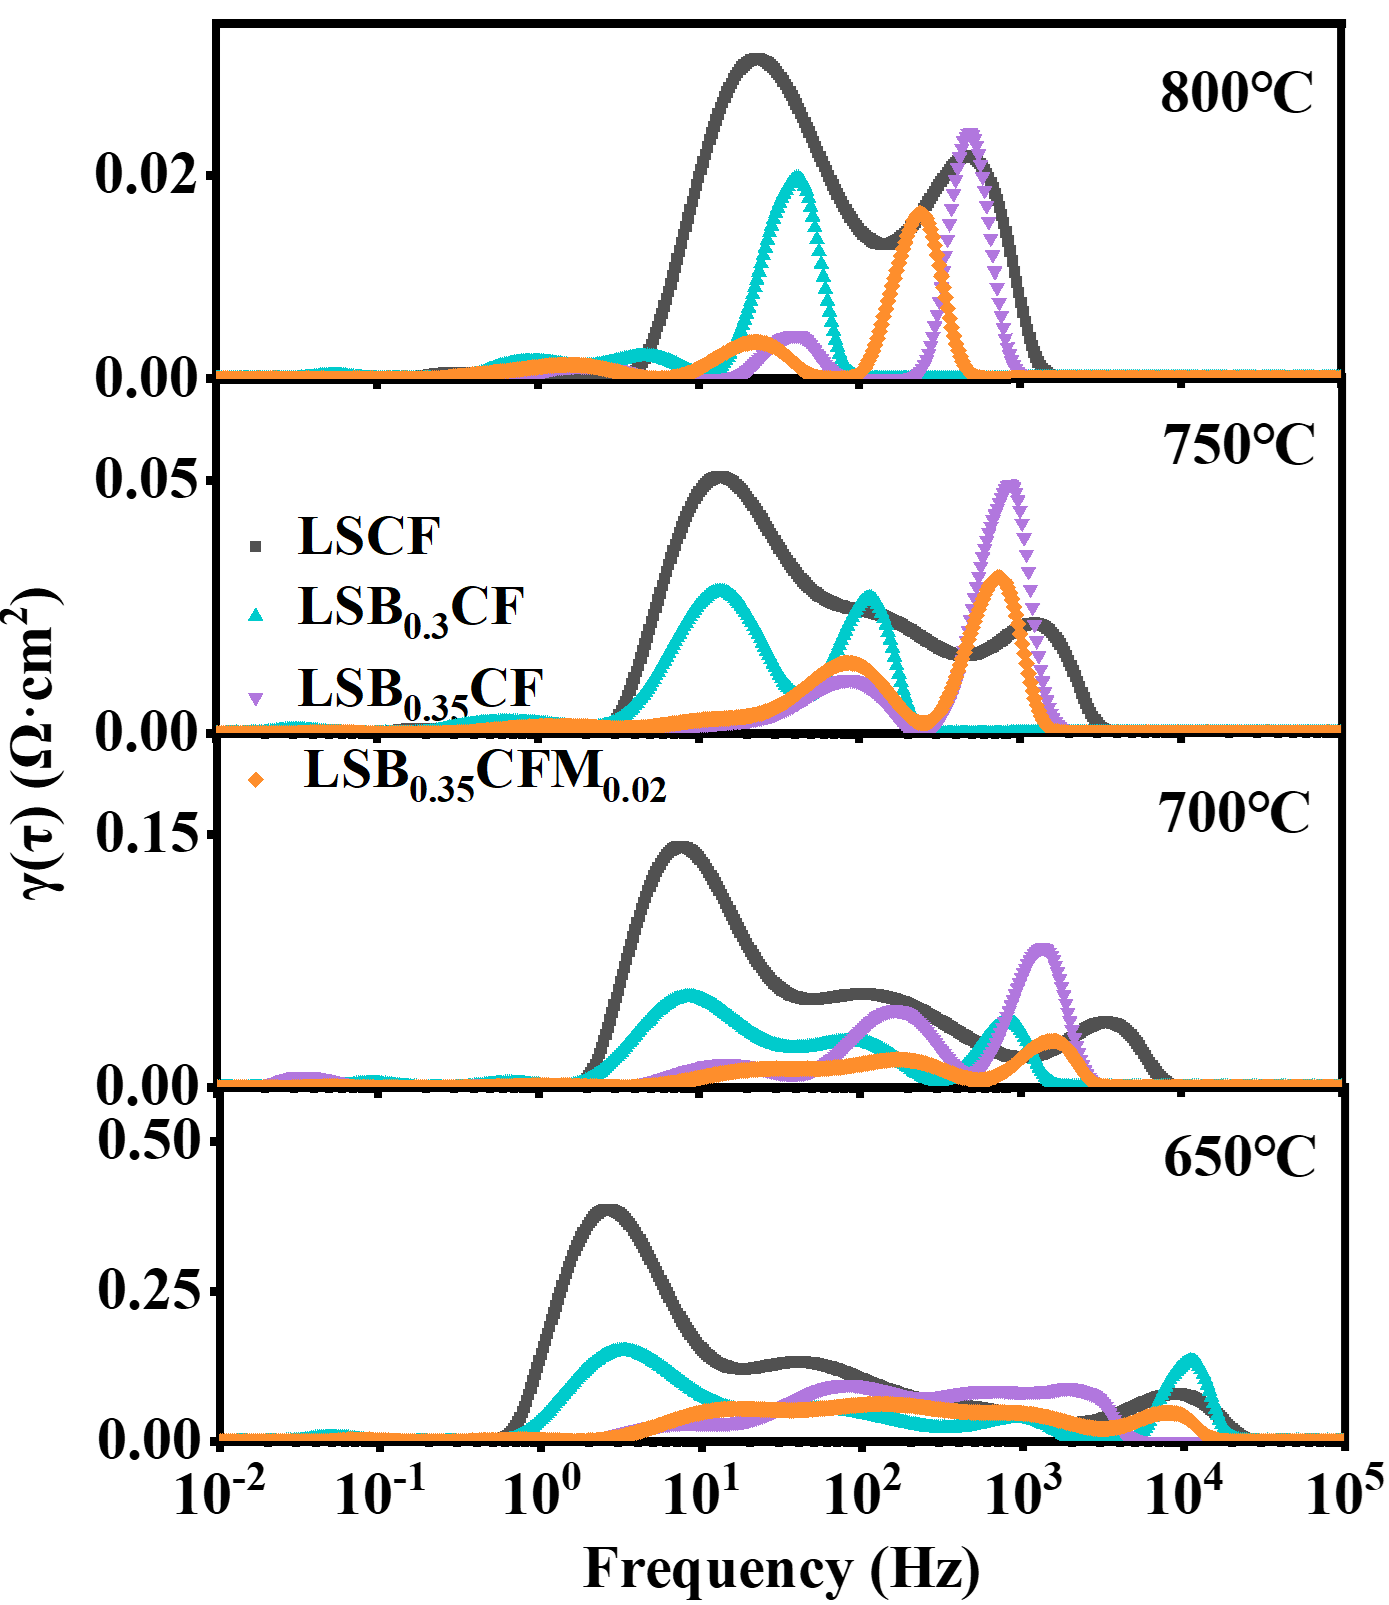


**Figure S4.** DRT curves of symmetric cells with LSB*x*CFMy (*x*=0, 0.3, 0.35; *y*=0, 0.02) at 650~800 ℃.


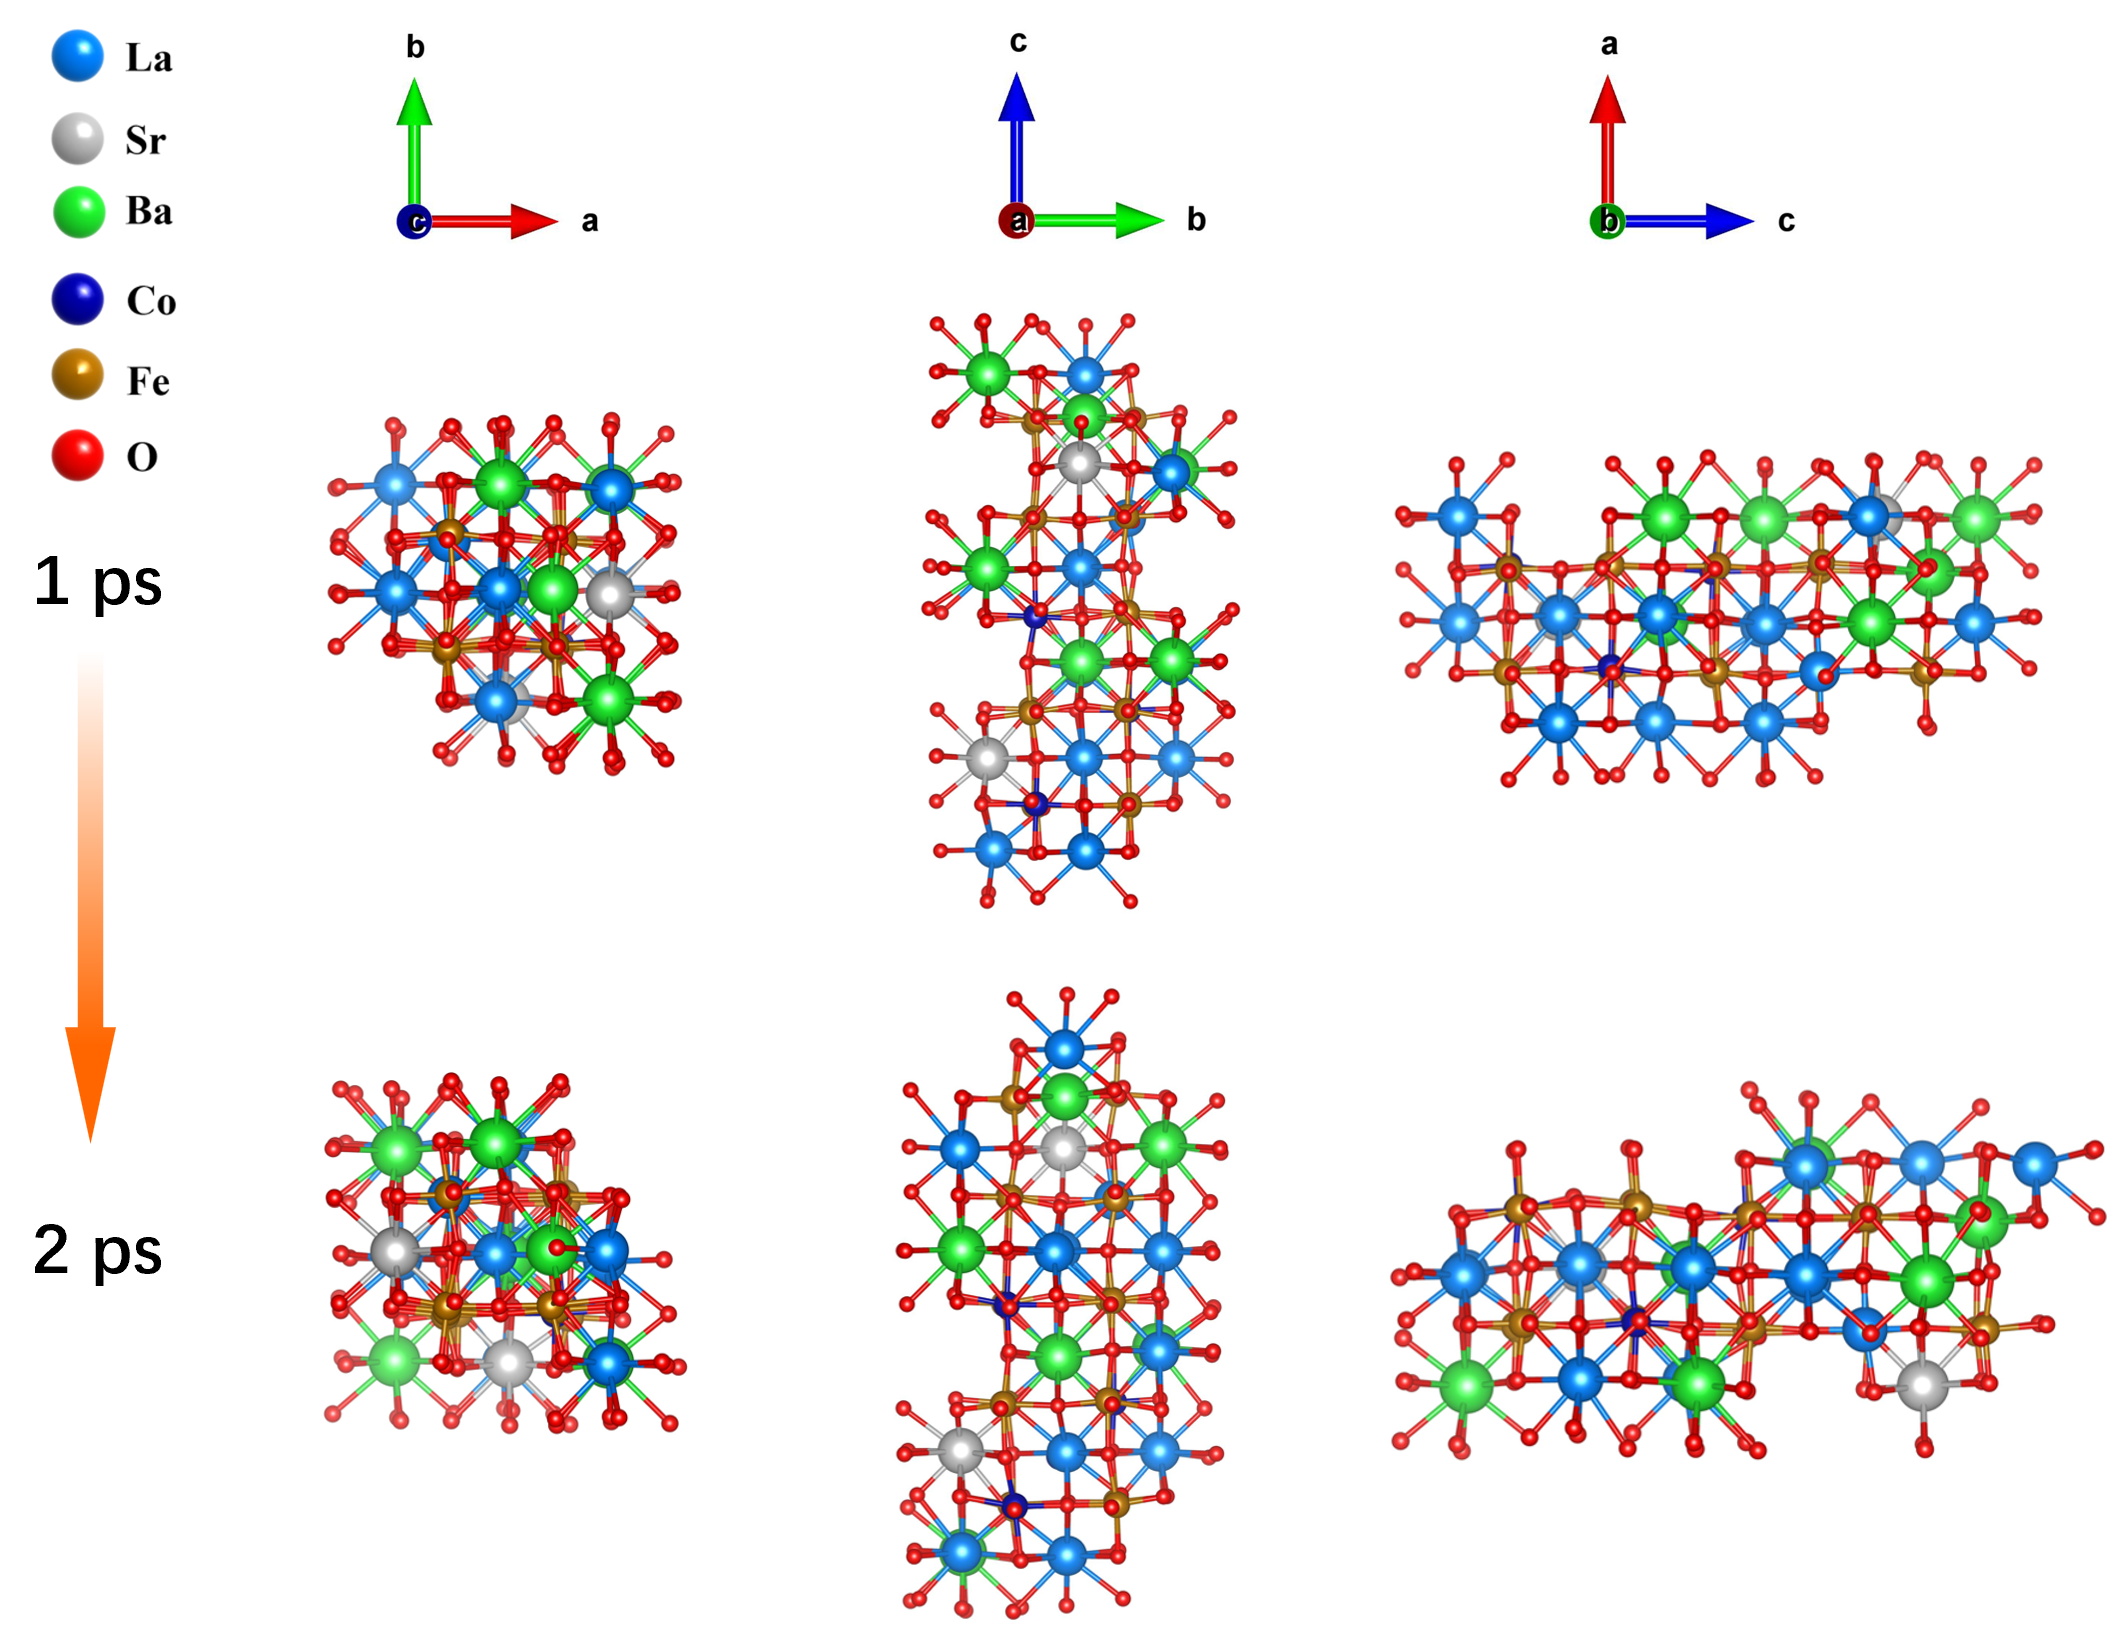


**Figure S5.** Structure of LSB0.3CF during the Ab Initio Molecular Dynamics (AIMD) simulations (2 ps) at 750 ℃.


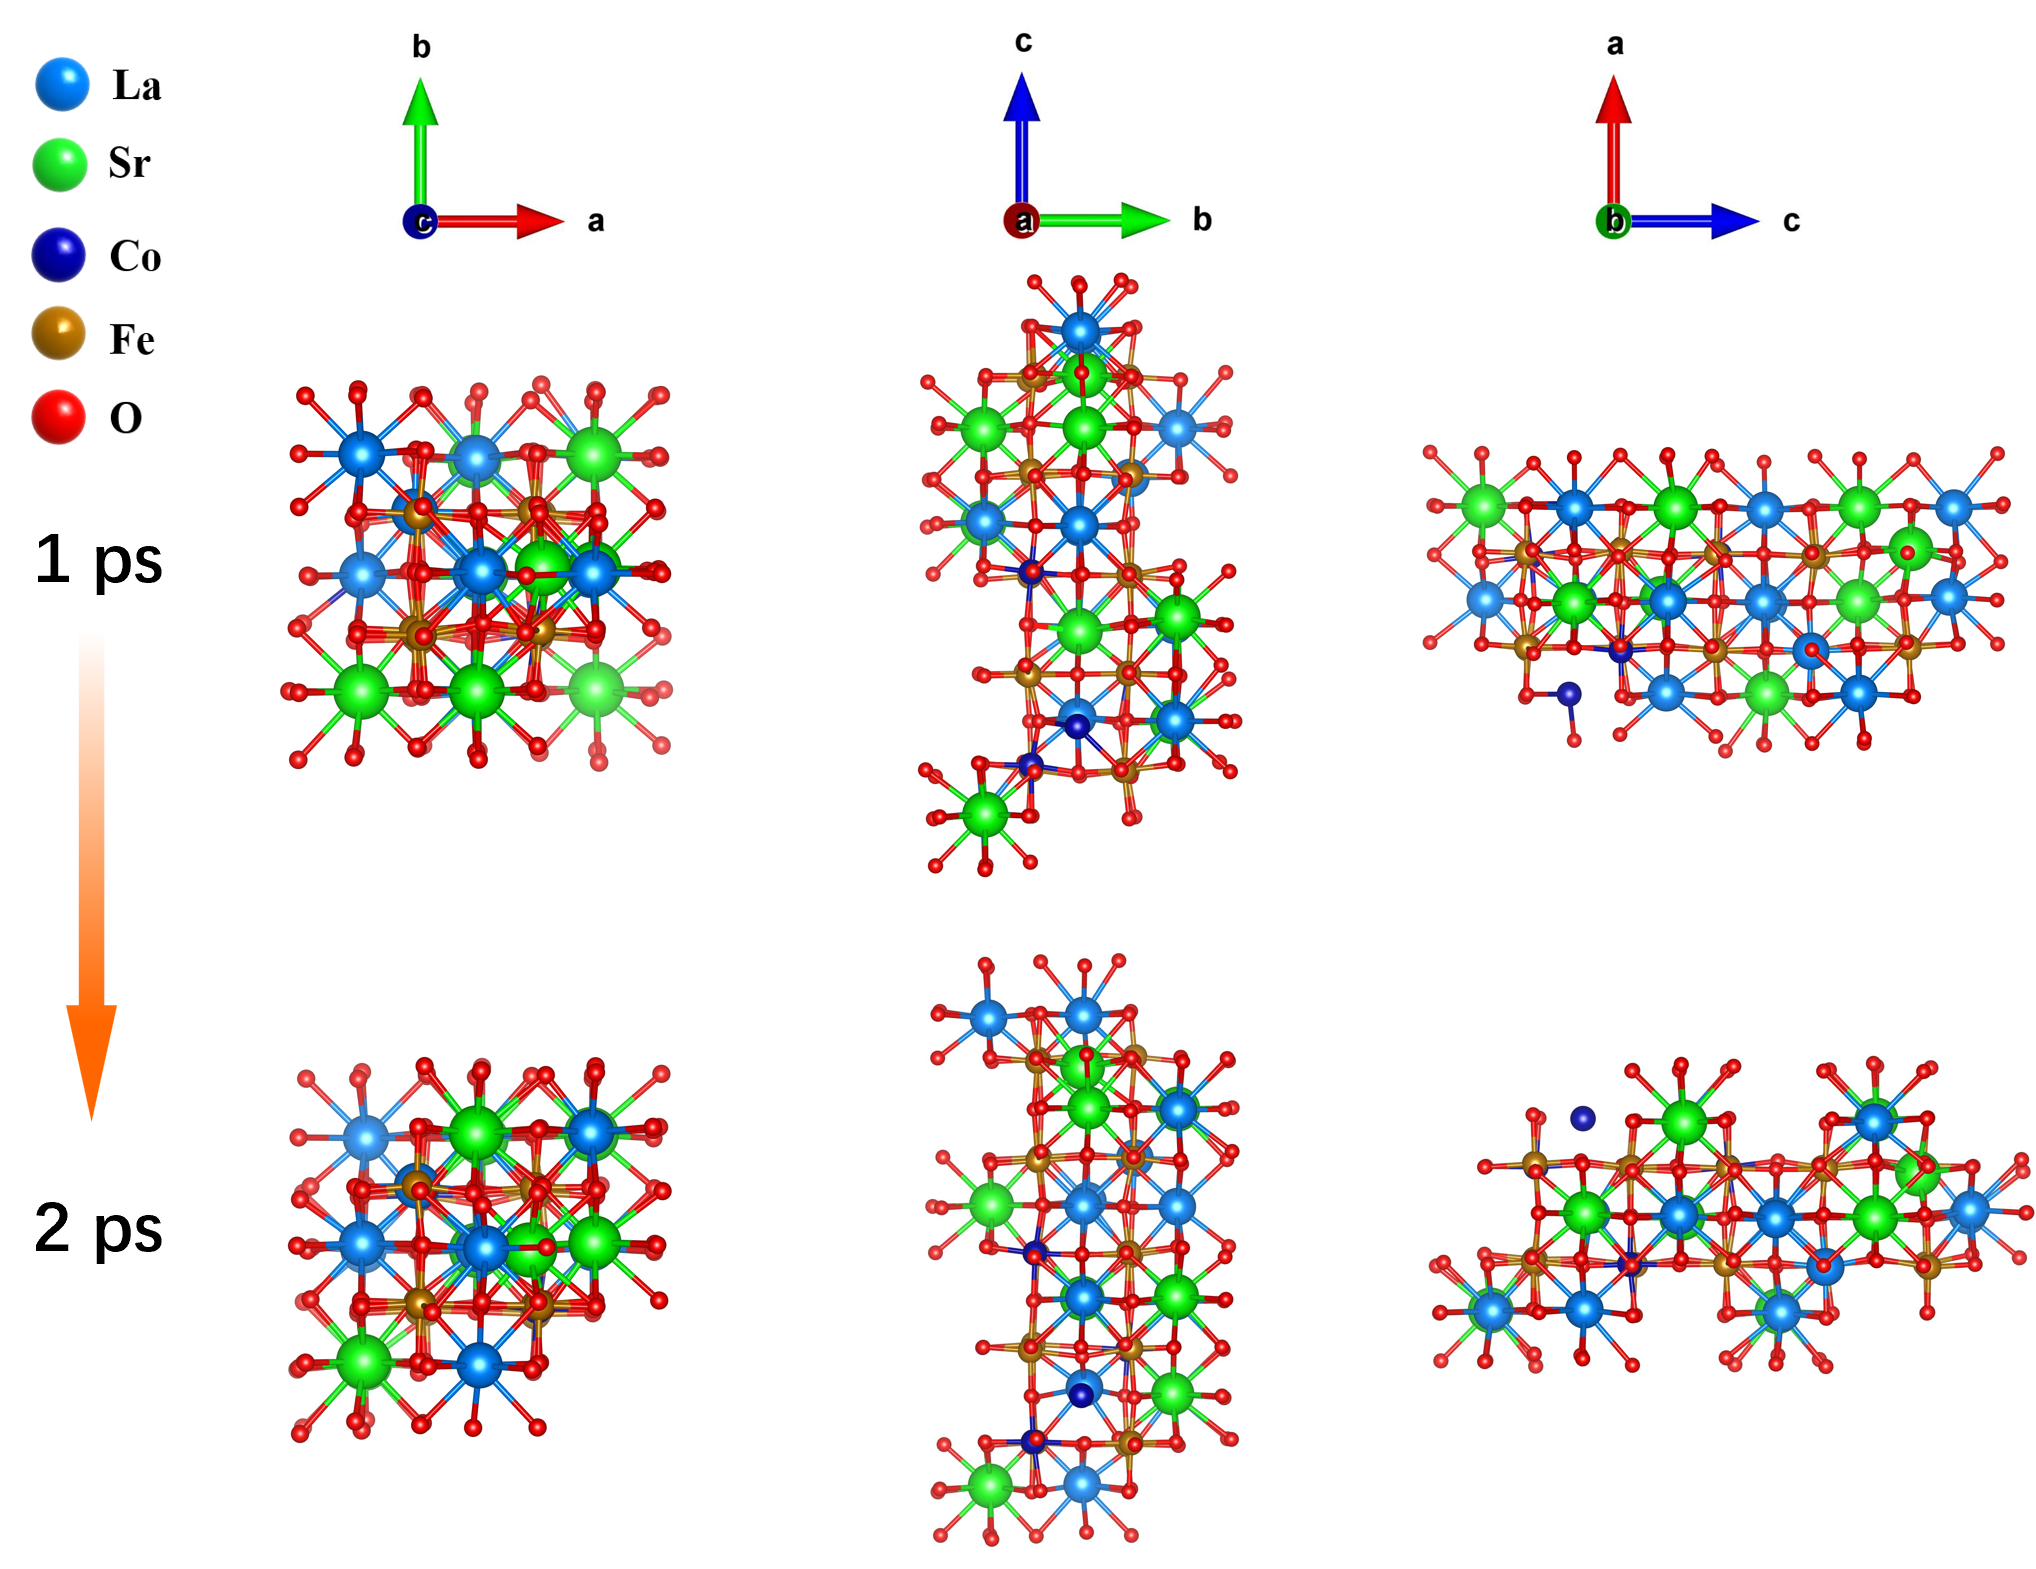


**Figure S6.** Structure of LSCF during the Ab Initio Molecular Dynamics (AIMD) simulations (2 ps) at 750 ℃.

The structural evolution of LSCF and LSB0.3CF models at 750 °C was investigated by DFT-based AIMD simulations. The simulations were executed by the VASP code within the MedeA environment, utilizing the Projector Augmented-Wave approach and each system was equilibrated for 2 ps.1-3 AIMD simulations quantitatively confirm this stabilization effect: LSB0.3CF exhibits minimal atomic displacement (MSD < 0.2 Å2) and stable A–O coordination (~12), with the system energy converging within ±0.02 eV per atom after 2 ps. In contrast, LSCF shows markedly higher MSD values (>0.4 Å2 for Co), reduced A–O coordination, and energy fluctuations exceeding ±0.06 eV per atom, indicative of structural instability and Co segregation (Figure S6).

(S1)

where *rA*: ionic radii of A-site cation, *rB*: ionic radii of B-site cation and *rX*: ionic radii of anion.8


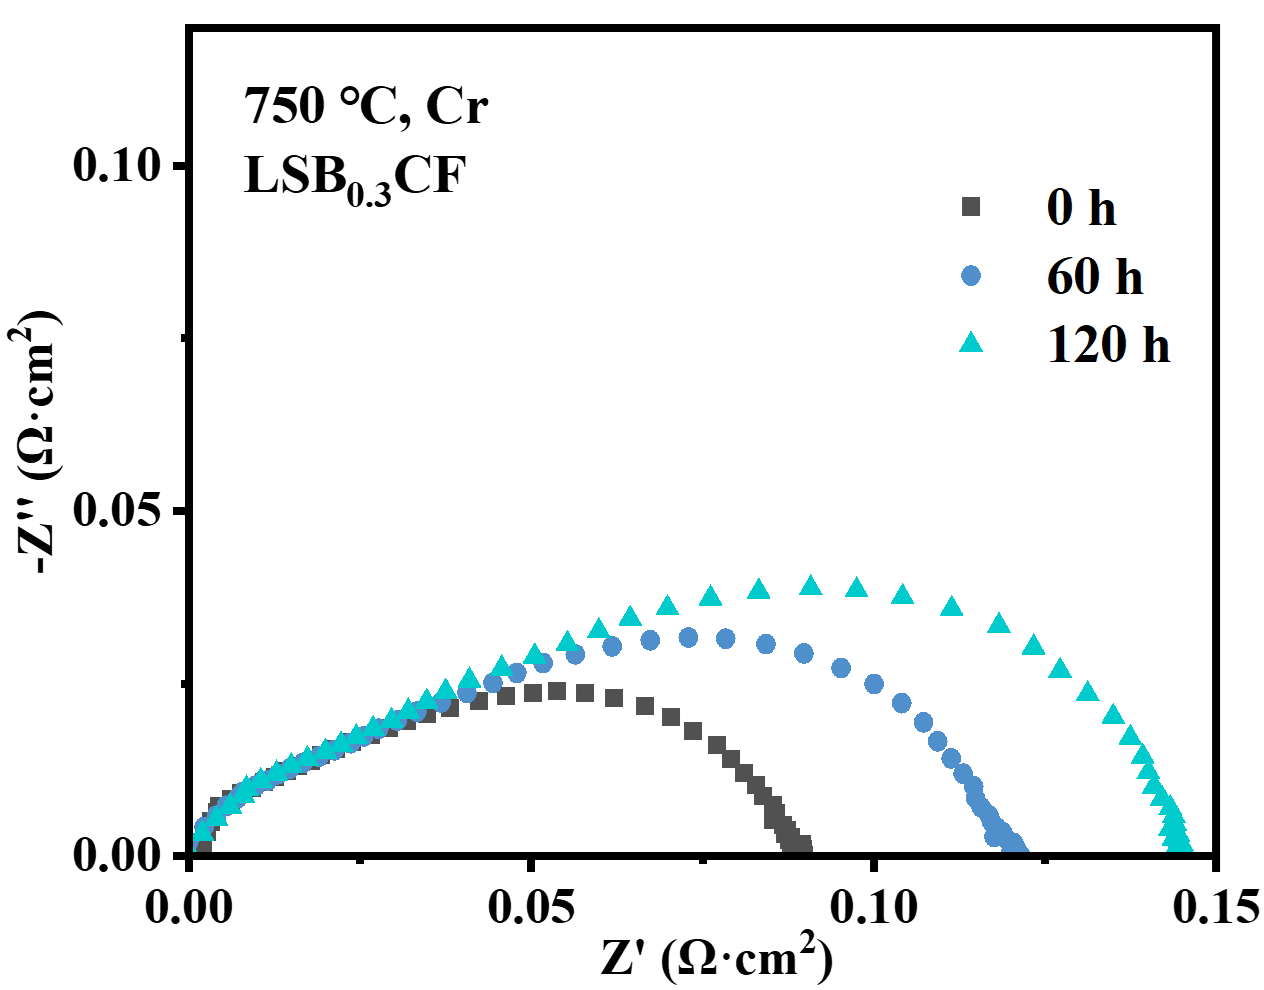


**Figure S7.** EIS curves of symmetric cells with LSB0.3CF at OCV under Cr poisoning at 750 °C for 120 h.


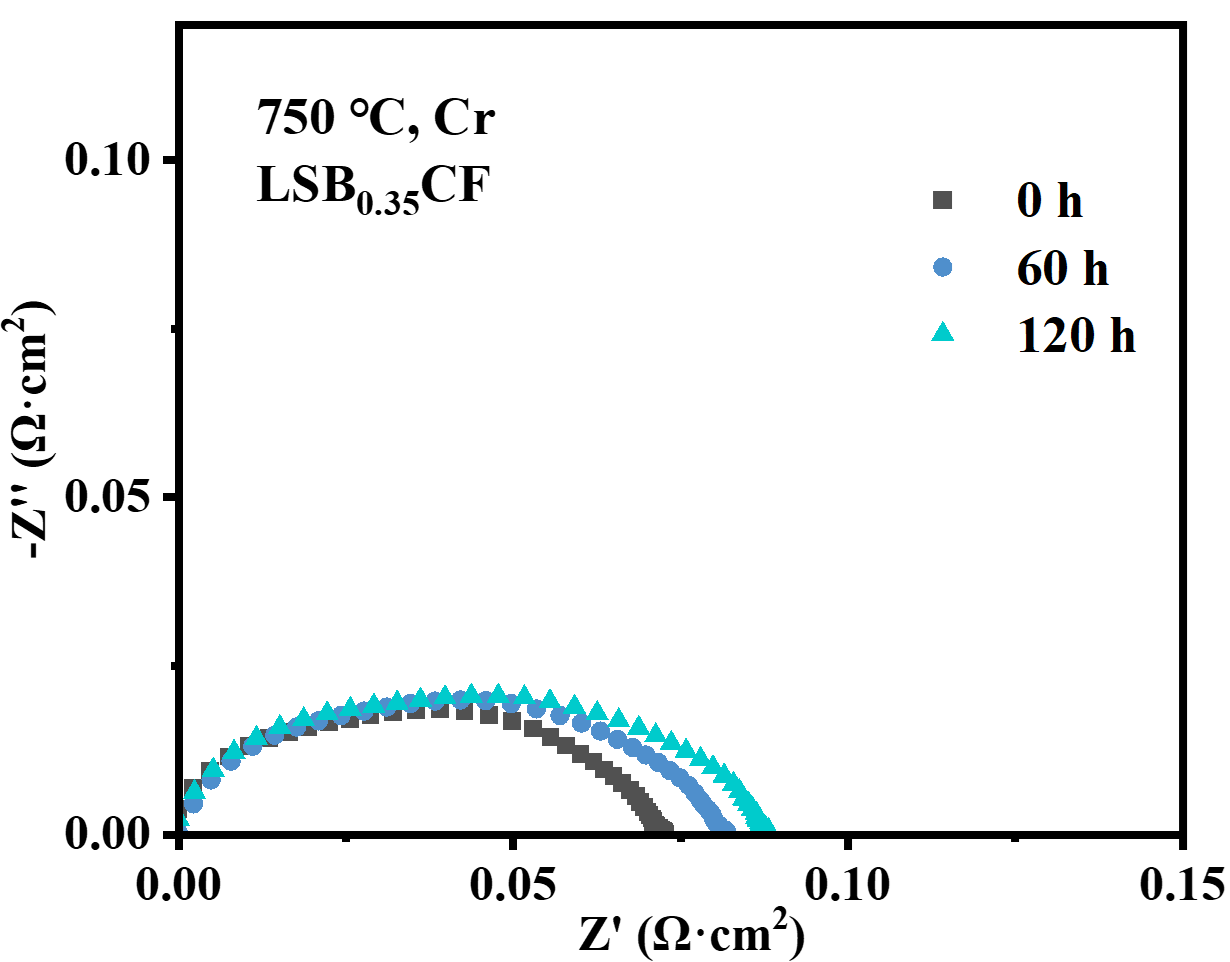


**Figure S8.** EIS curves of symmetric cells with LSB0.35CF at OCV under Cr2O3 exposure at 750 °C for 120 h.


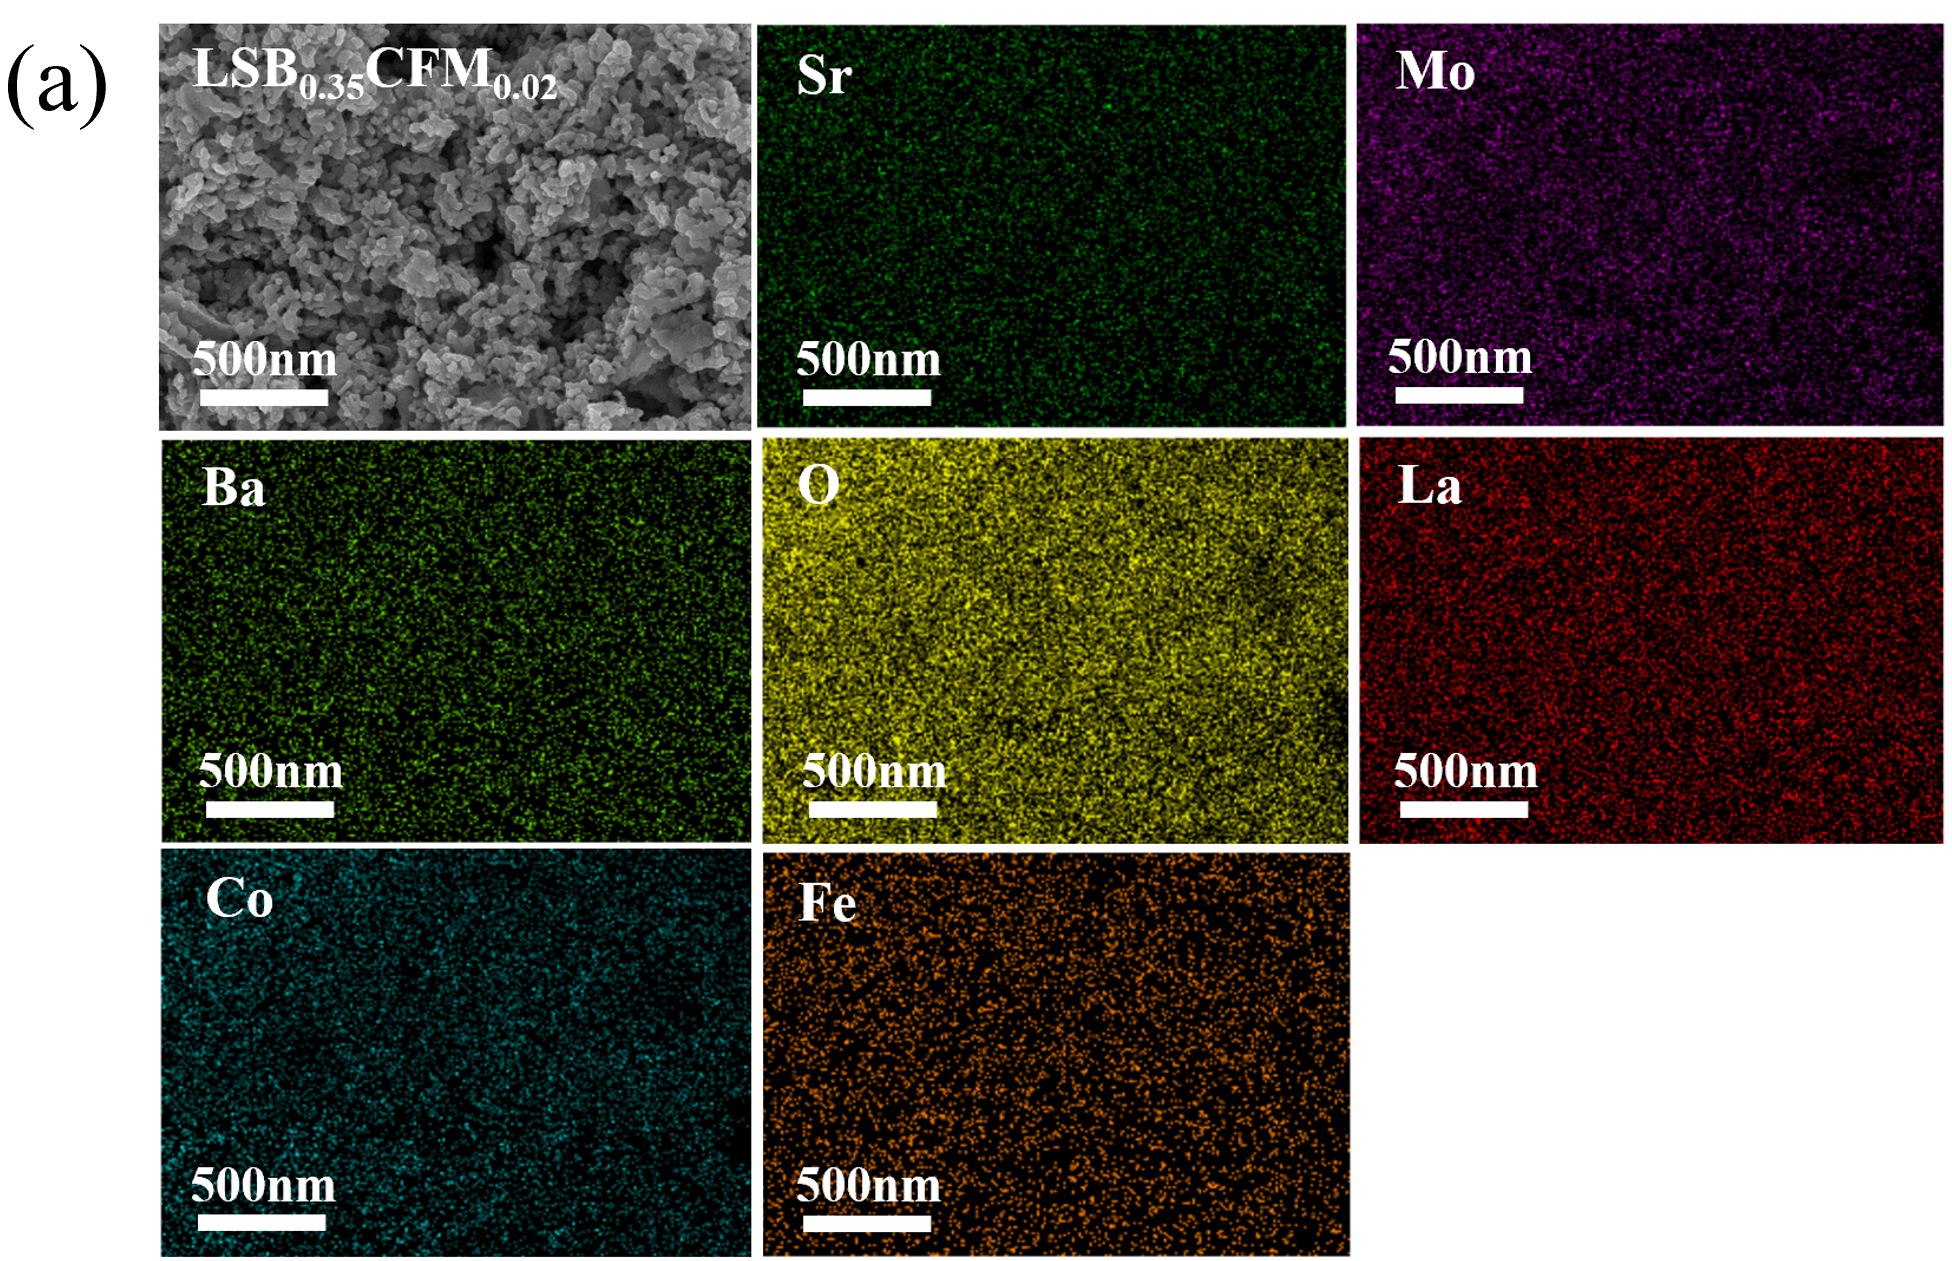

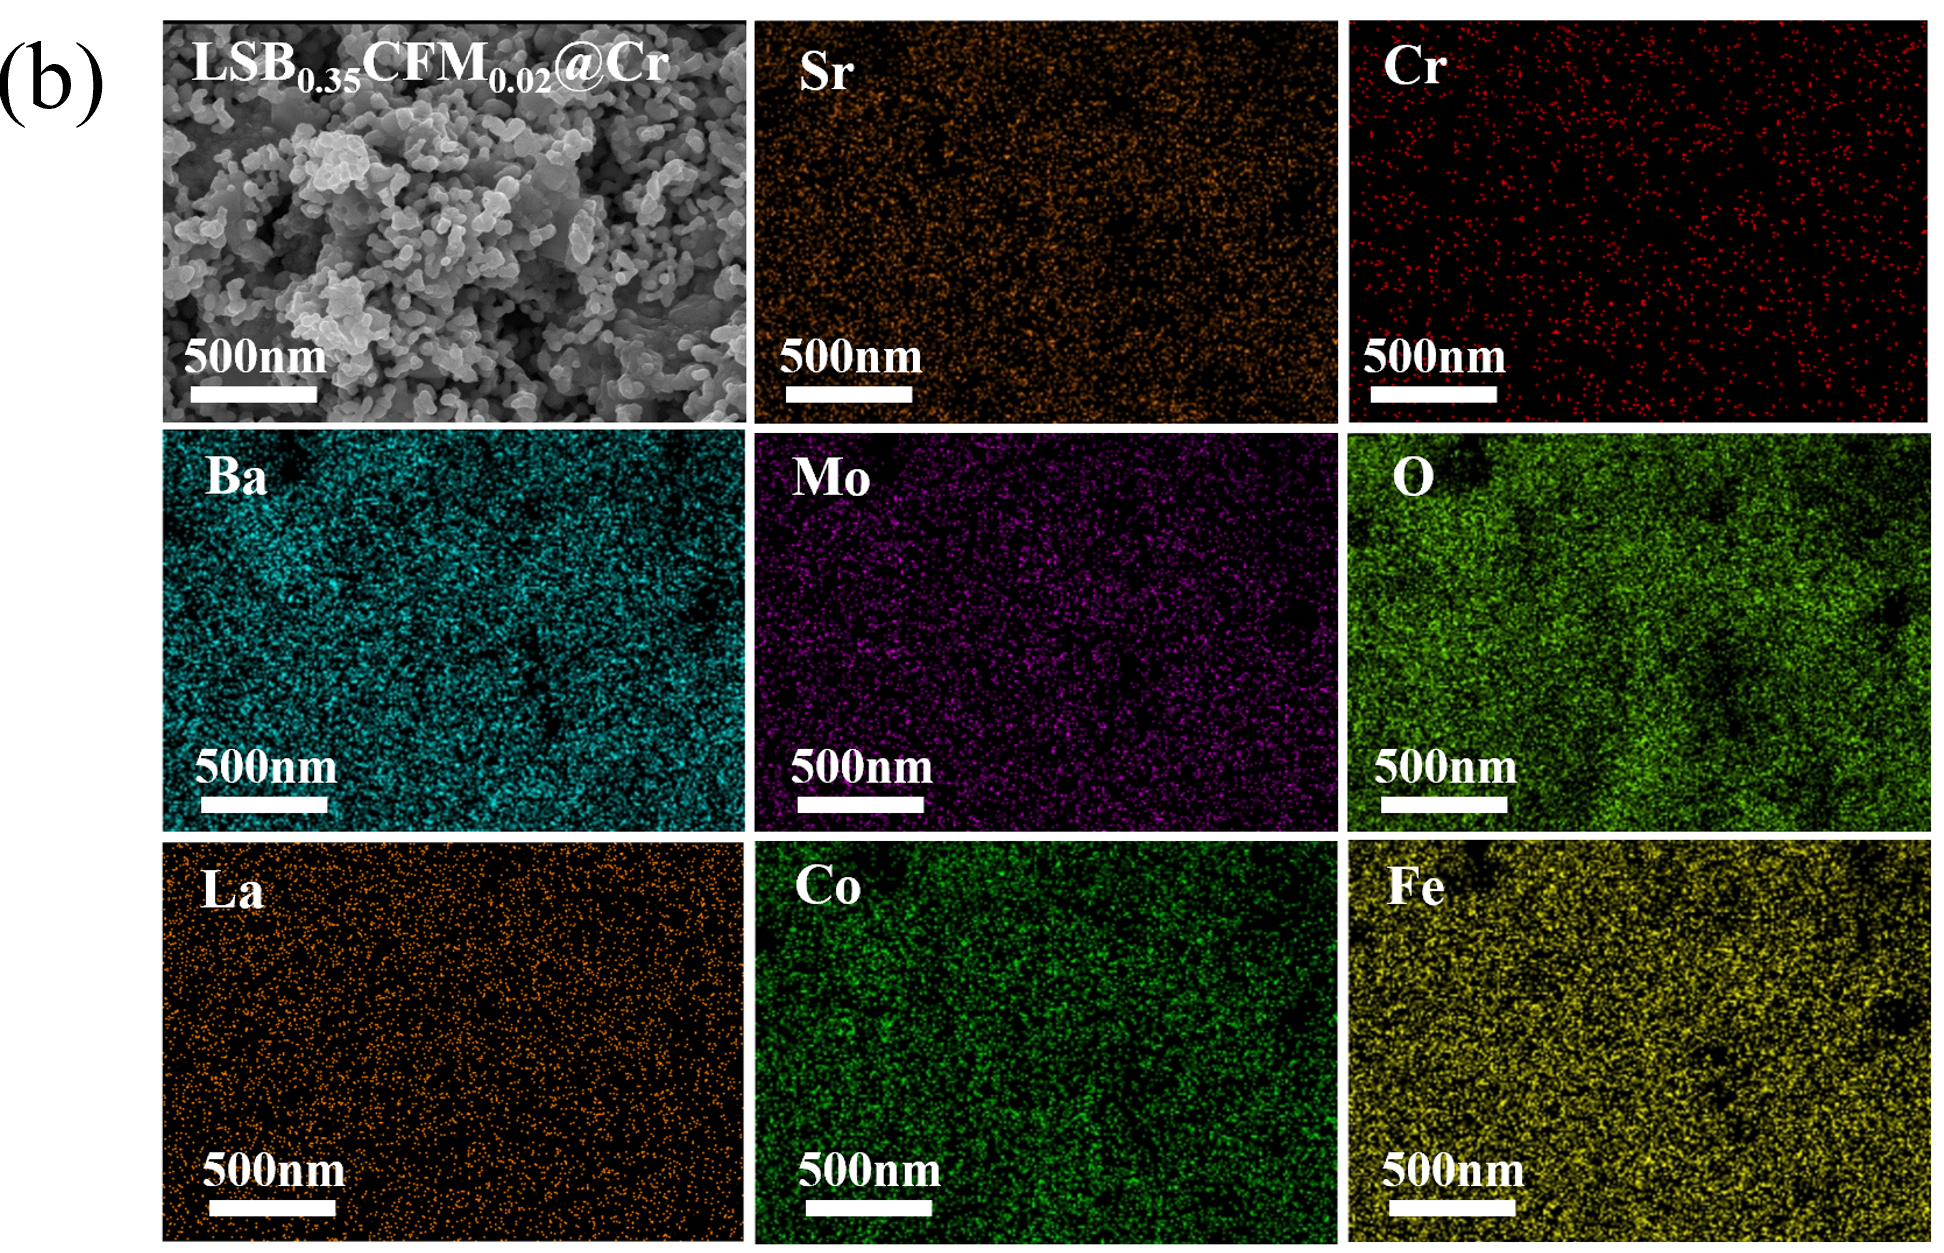


**Figure S9.** SEM images of LSB0.35CFM0.02 cathode at 750 ℃ (a) before and (b) after Cr2O3 exposure for 120 h.


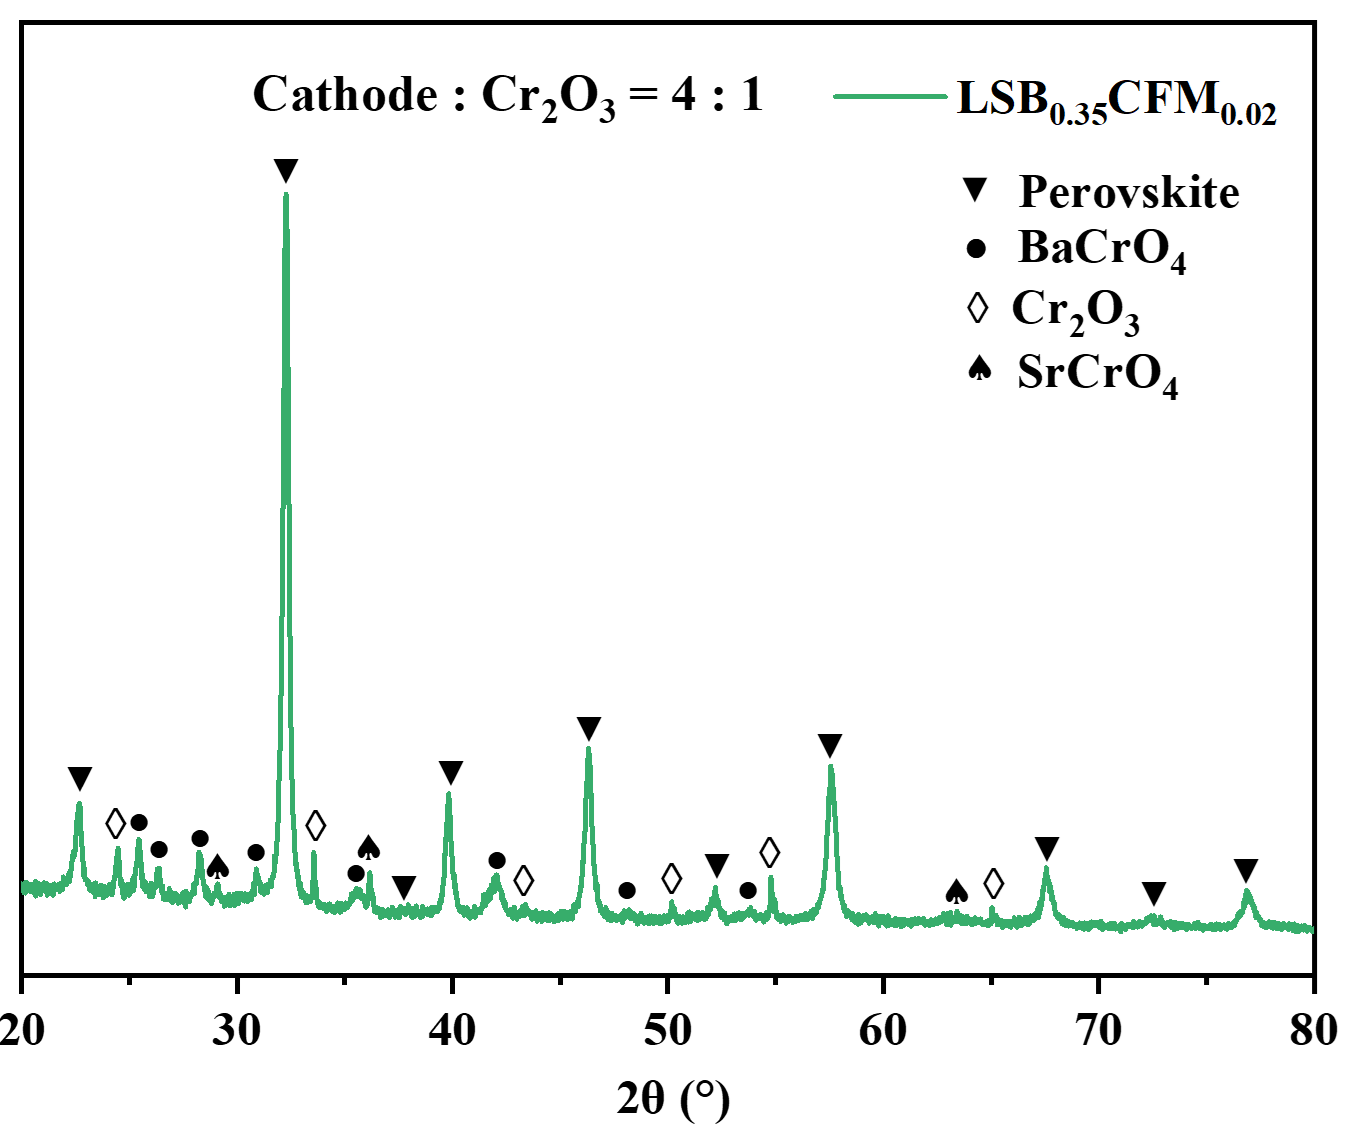


**Figure S10.** XRD of LSB0.35CFM0.02-Cr2O3 mixtures (4:1 weight ratio) after sintering at 750℃ for 5 h.


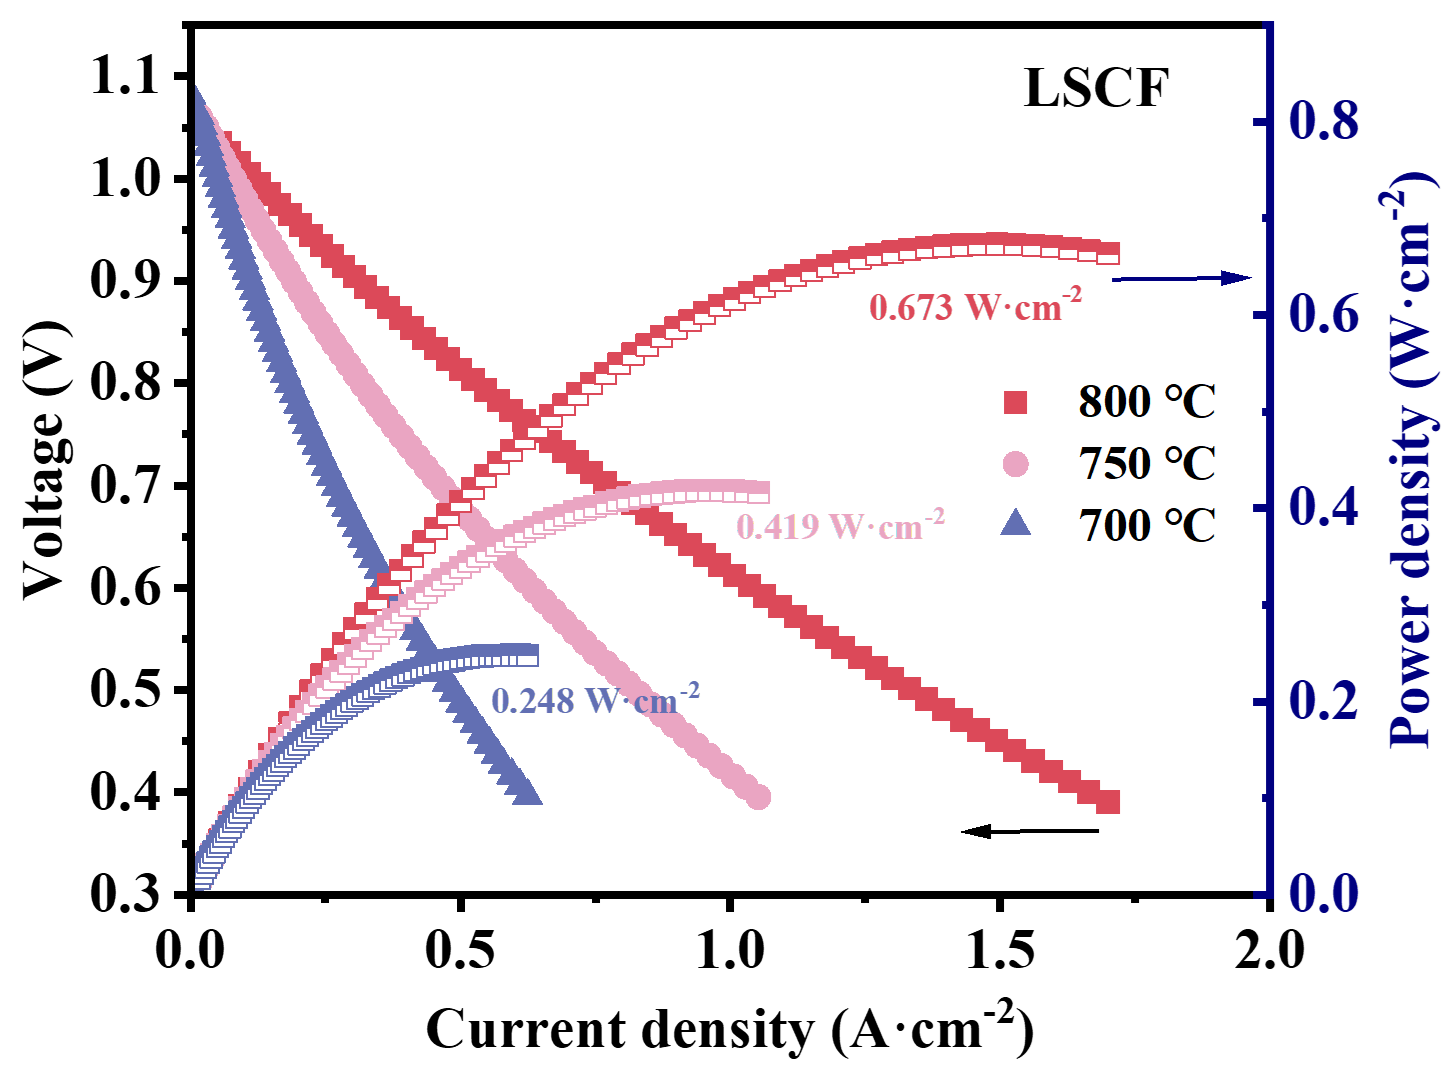


**Figure S11.** *I-V-P* curves of LSCF cell in FC mode at 700~800 ℃.


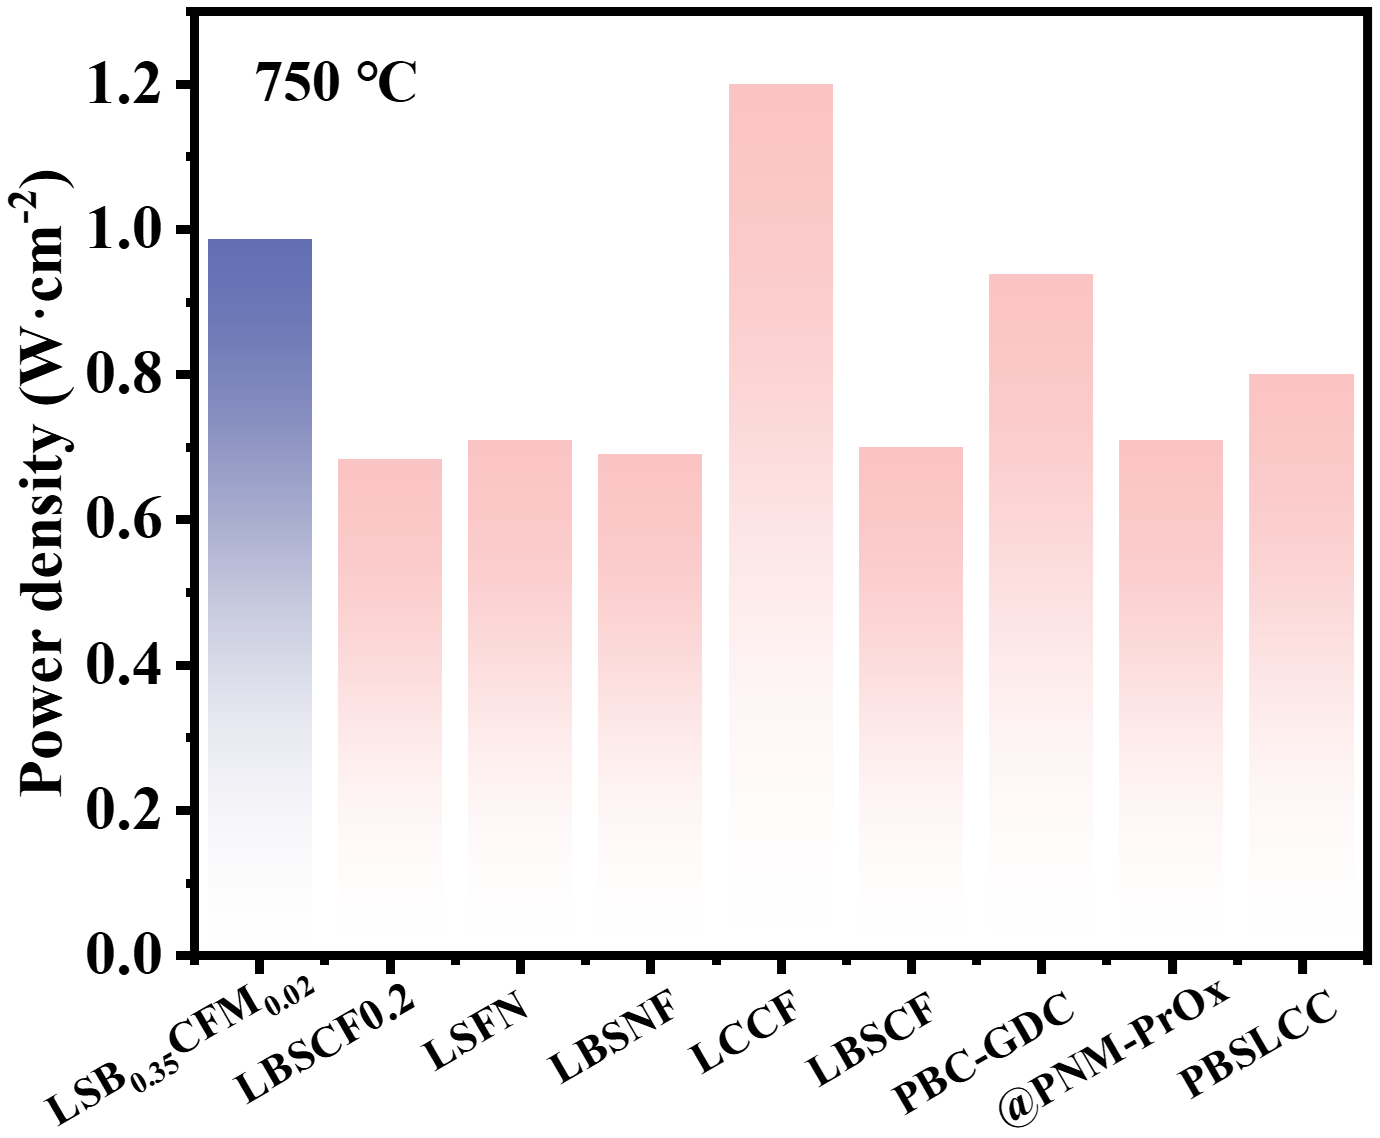


**Figure S12.** PPD comparison of LSB0.35CFM0.02 cell with other literature at 750 ℃.


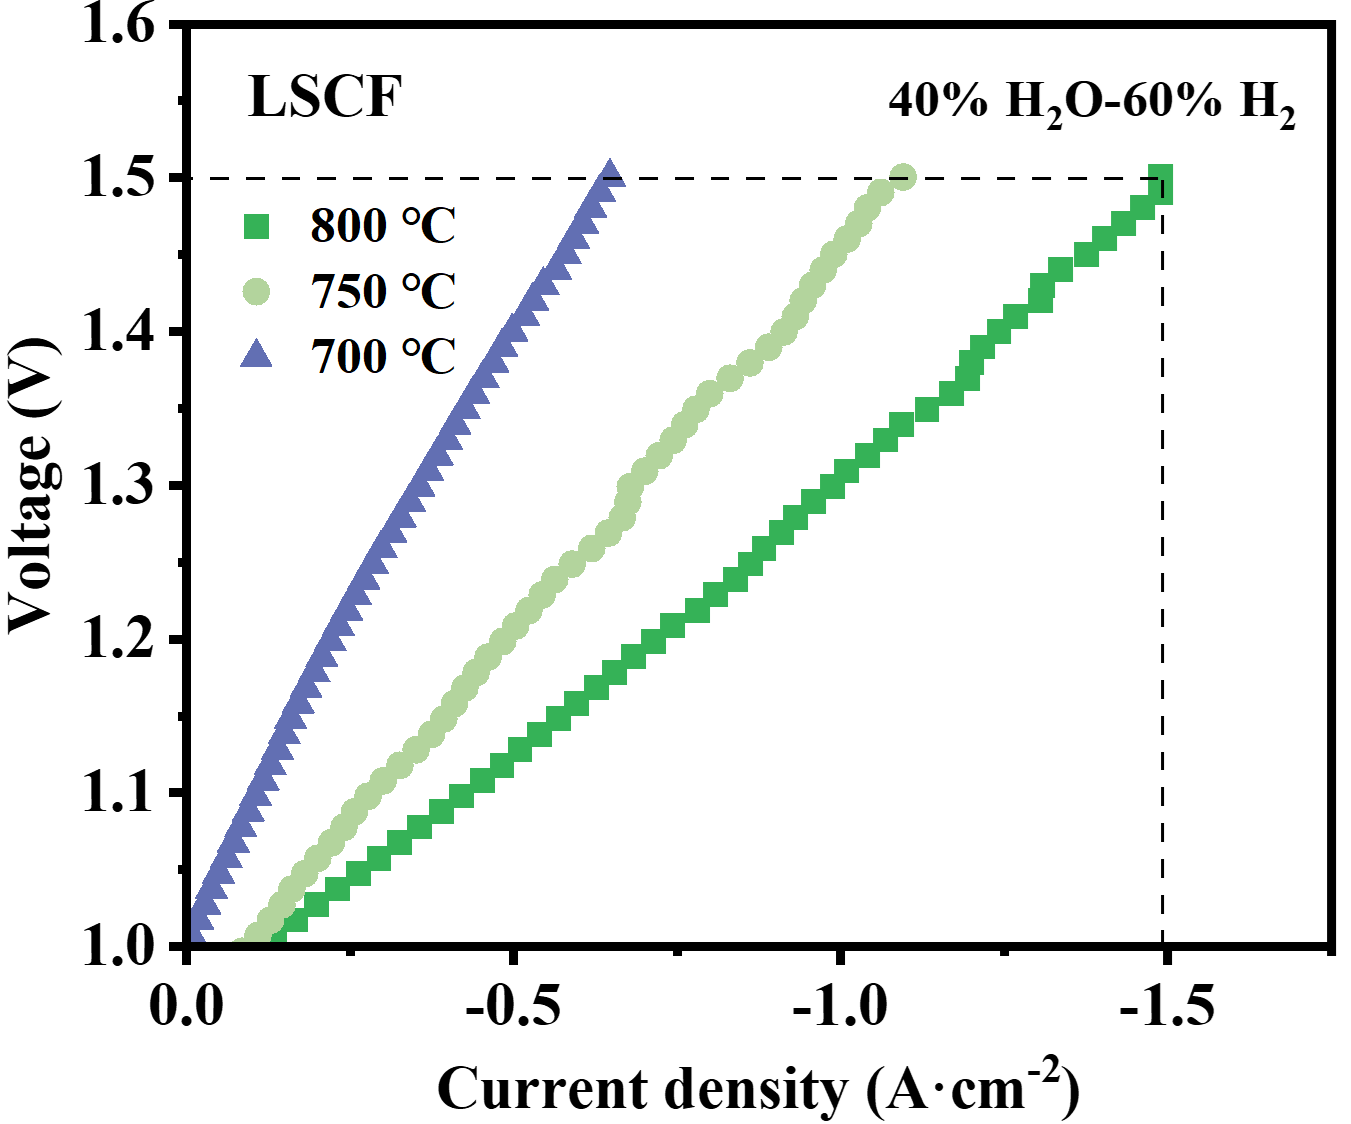


**Figure S13.** *I-V* curves of LSCF cell in EC mode at 700~800 ℃.


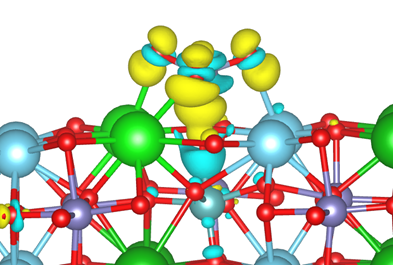


**Figure S14.** Electron charge density difference isosurface for CrO3 adsorbed on the LSBCFM surface. Charge depletion and accumulation are represented by blue and yellow regions, respectively. The isosurface value is set to ±0.005 e/Å.


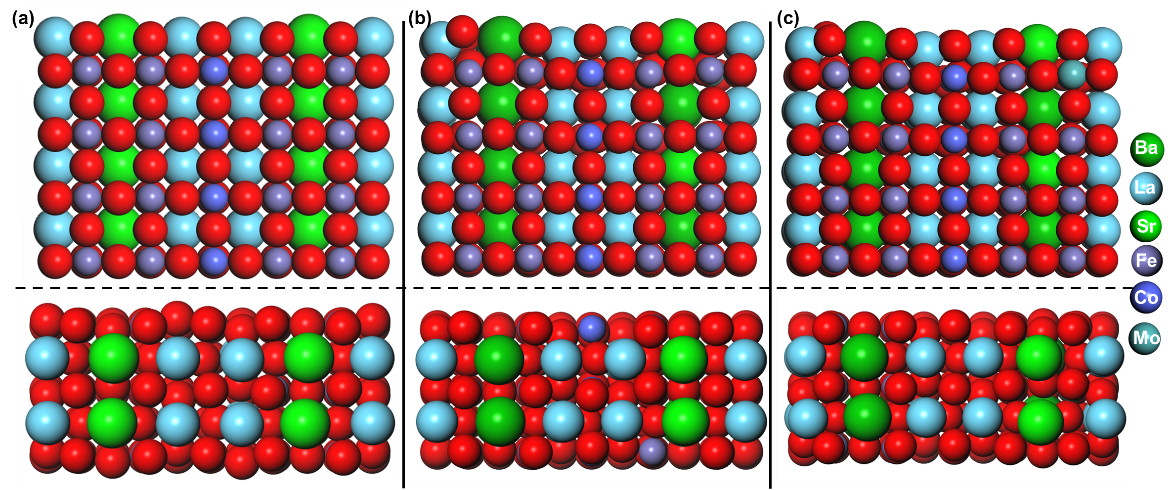


**Figure S15.** The side (lower) and top (upper) views of (a) LSCF, (b) LSBCF and (c) LSBCFM surface.

The adsorption energy of CrO3 was defined as *E*ads = *E*CrO3+surface– *E*CrO3–*E*surface, where *E*CrO3+surface, *E*CrO3, and *E*surface denote the total energies of the adsorbed system, isolated CrO3 in vacuum, and clean surface, respectively. The adsorption Gibbs free energy was calculated as *G*ads = *E*ads + *ΔE*ZPE – *TΔS*, where zero-point energy (*ΔE*ZPE) and entropy (*ΔS*) contributions were included. All Gibbs free energies were evaluated at 750 °C.

**Table S1.** Crystal structure parameters of materials obtained from Rietveld XRD refinements.

| Material | LSB0.35CFM0.02 | BaCoO3 |
| --- | --- | --- |
| Phase structure | *Pbnm* | *P63/mmc* |
| a(Å) | 5.4998 | 5.6552 |
| b(Å) | 5.5412 | 5.6552 |
| c(Å) | 7.7923 | 4.9643 |
| V(Å3) | 237.47 | 158.76 |
| Fract(%) | 97.48 | 2.52 |
| Rp | 5.51 | 5.25 |
| Rwp | 6.88 | 6.45 |
| χ2 | 3.35 | 3.26 |

**Reference**

1 Perdew, J. P., Burke, K. & Ernzerhof, M. Generalized Gradient Approximation Made Simple. *Physical Review Letters* **77**, 3865-3868, doi:10.1103/PhysRevLett.77.3865 (1996).

2 Kresse, G. & Furthmüller, J. Efficient iterative schemes for ab initio total-energy calculations using a plane-wave basis set. *Physical Review B* **54**, 11169-11186, doi:10.1103/PhysRevB.54.11169 (1996).

3 Grimme, S., Antony, J., Ehrlich, S. & Krieg, H. A consistent and accurate ab initio parametrization of density functional dispersion correction (DFT-D) for the 94 elements H-Pu. *The Journal of chemical physics* **132**, 154104, doi:10.1063/1.3382344 (2010).

4 Liu, B. & Zhao, X. The synergetic effect of V and Fe-co-doping in TiO 2 studied from the DFT + U first-principle calculation. *Applied Surface Science* **399**, 654-662, doi:10.1016/j.apsusc.2016.12.075 (2017).

5 Wang, H. *et al.* Interfacial Coupling Effect on Electron Transport in Hierarchical TaON/Au/ZnCo-LDH Photoanode with Enhanced Photoelectrochemical Water Oxidation. *ACS Applied Materials & Interfaces* **11**, 33062-33073, doi:10.1021/acsami.9b11521 (2019).

6 Qin, Y. *et al.* Hydroperoxyl-mediated C-H bond activation on Cr single atom catalyst: An alternative to the Fenton mechanism. *Journal of Catalysis* **417**, 323-333, doi:10.1016/j.jcat.2022.12.017 (2023).

7 Agarwal, V. & Metiu, H. Oxygen Vacancy Formation on α-MoO3 Slabs and Ribbons. *The Journal of Physical Chemistry C* **120**, 19252-19264, doi:10.1021/acs.jpcc.6b06589 (2016).

8 Randall, C. A., Bhalla, A. S., Shrout, T. R. & Cross, L. E. Classification and consequences of complex lead perovskite ferroelectrics with regard to B-site cation order. *J. Mater. Res.* **5**, 829-834, doi:10.1557/JMR.1990.0829 (1990).
